# Supplementary material
Source: publisher figshare collection journal article supplement (https://sage.figshare.com/ndownloader/files/15964568)
Supplement: Supplementary file 1 [file 15964568]

The Charm of Behavior-Based Pricing  
When Consumers' Taste Is Diverse and the Consideration Set Is Limited  
WEB APPENDIX

Offers from cable TV companies

**America's Top 120**

**\$49<sup>99</sup>**  
mo  
2-Year Price Guarantee  
REG. \$69.99  
Plus Taxes for 2 yrs.

190 Channels  
More of what you want, for less!

CBS, CNN, FX, CN, Syfy, E!, Disney, ESPN, TruTV, FOX, ESPN, Plus More!

View Package Details

**dish**

**XFINITY TV: All Your Favorite TV Shows, Movies, Sports, and More**

Starting at **\$54<sup>99</sup>** mo for 12 mos

**XFINITY TV**

- 140+ Channels
- On demand & on-the-go access
- The most live sports

Call now for XFINITY TV deals!  
**1-877-342-1024**

[See Available Deals](#)

**Charter® Spectrum TV**

From **\$64<sup>99</sup>**/mo for 12 mos

140+ channels including HBO HD, ESPN Movies and Sports, On Demand, more at HD

Offers from credit card companies

Citi® Diamond Preferred® Card – 21 Month Intro Offer on BT and Purchases

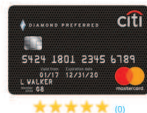

★★★★★ (0)

**Intro Purchase APR**

0%\* for 21 months on Purchases\*

**Intro BT APR**

0%\* for 21 months on Balance Transfers\*

**Regular Purchase APR**

13.49% - 23.49%\* (Variable)

[Apply Now](#)

[Expand Details](#)

Bank of America® Cash Rewards Credit Card

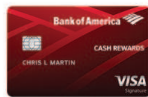

★★★★★ (0)

[Add to Favorites](#)

**Intro Purchase APR**

0% Introductory APR on purchases for 12 billing cycles

**Intro BT APR**

0% Intro APR for 12 billing cycles for balance transfers made in the first 60 days

**Regular APR**

13.99% - 23.99% Variable APR on purchases and balance transfers

[Apply Now](#)

[on Bank of America's secure site](#)

[Expand Details](#)
